# Supplementary material for: Genome-Wide Association Study Identifies Novel Candidate Variants Associated with Postoperative Nausea and Vomiting
Source: MDPI journal article supplement (doi:10.3390/cancers15194729), 2023-09-26
Supplement: s1 [file s1]

## Supplementary Materials

# Genome-Wide Association Study Identifies Novel Candidate Variants Associated with Postoperative Nausea and Vomiting

Daisuke Nishizawa <sup>1,†</sup>, Ryoze Morino <sup>2,†</sup>, Rie Inoue <sup>1,3</sup>, Seii Ohka <sup>1</sup>, Shinya Kasai <sup>1</sup>, Junko Hasegawa <sup>1</sup>, Yuko Ebata <sup>1</sup>, Kyoko Nakayama <sup>1</sup>, Hiroyuki Sumikura <sup>3</sup>, Masakazu Hayashida <sup>1,3</sup>, Miyuki Yokota <sup>4,5</sup> and Kazutaka Ikeda <sup>1,\*</sup>

**Table S1.** Demographic and clinical data of patient subjects for the replication study.

| Demographic data:                                   | <i>n</i> | Minimum | Maximum | Mean   | SD     | Median |
|-----------------------------------------------------|----------|---------|---------|--------|--------|--------|
| Gender                                              |          |         |         |        |        |        |
| male                                                | 0        |         |         |        |        |        |
| female                                              | 333      |         |         |        |        |        |
| Age [years]                                         | 333      | 21      | 69      | 39.20  | 8.60   | 40.00  |
| Height [cm]                                         | 333      | 141.3   | 174.5   | 159.82 | 5.57   | 160.00 |
| Weight [kg]                                         | 333      | 37.45   | 82.9    | 54.55  | 8.22   | 53.55  |
| Body mass index (BMI) [kg/m <sup>2</sup> ]          | 333      | 15.10   | 29.70   | 21.36  | 3.09   | 20.90  |
| Duration of surgery [min]                           | 333      | 26      | 303     | 128.90 | 45.20  | 124.00 |
| Duration of anaesthesia [min]                       | 333      | 69      | 328     | 175.10 | 48.20  | 171.00 |
| Total dose of propofol [mg]                         | 333      | 0       | 1850    | 854.10 | 302.20 | 800.00 |
| Average remifentanyl infusion rate [µg/kg/min]      | 333      | 0.022   | 0.713   | 0.30   | 0.07   | 0.30   |
| Frequency of acetaminophen administration           | 333      | 1       | 4       | 2.9    | 0.6    | 3      |
| PCA fentanyl consumption (µg/kg)                    | 333      | 0       | 20.88   | 5.53   | 4.44   | 4.54   |
| Total postoperative fentanyl administration (µg/kg) | 333      | 3.92    | 25.39   | 9.73   | 4.51   | 8.79   |
| Incidence of PONV                                   |          |         |         |        |        |        |
| absence                                             | 289      |         |         |        |        |        |
| presence                                            | 44       |         |         |        |        |        |
| Administration of rescue analgesic                  |          |         |         |        |        |        |
| absence                                             | 306      |         |         |        |        |        |
| presence                                            | 27       |         |         |        |        |        |
| Average pain score of numerical rating scale        | 333      | 0       | 6       | 1.83   | 1.15   | 1.70   |

**Table S2.** Top 20 candidate SNPs selected from the GWAS for nausea in all patients.

| Model | Rank | CH<br>R | SNP                  | Posi-<br>tion | <i>p</i>        | Related gene     | Genotype (Nau-<br>sea +) |     |     | Genotype (Nau-<br>sea -) |     |     |
|-------|------|---------|----------------------|---------------|-----------------|------------------|--------------------------|-----|-----|--------------------------|-----|-----|
|       |      |         |                      |               |                 |                  | A/<br>A                  | A/B | B/B | A/<br>A                  | A/B | B/B |
| Trend | 1    | 21      | rs283650<br>5        | 3991855<br>3  | 0.000004<br>044 | <i>ERG</i>       | 16                       | 91  | 158 | 57                       | 258 | 226 |
| Trend | 2    | 16      | rs992593<br>4        | 1702824<br>7  | 0.000005<br>621 |                  | 1                        | 65  | 199 | 3                        | 60  | 478 |
| Trend | 3    | 20      | rs602169<br>3        | 5069428<br>7  | 0.000006<br>882 |                  | 42                       | 154 | 69  | 59                       | 247 | 235 |
| Trend | 4    | 16      | rs649864<br>3        | 1705087<br>4  | 0.000008<br>058 |                  | 2                        | 71  | 192 | 5                        | 68  | 467 |
| Trend | 5    | 5       | rs771972<br>3        |               | 0.000011<br>76  |                  | 27                       | 126 | 112 | 122                      | 250 | 169 |
| Trend | 6    | 20      | rs601722<br>7        | 4259322<br>0  | 0.000012<br>31  | <i>TOX2</i>      | 0                        | 39  | 226 | 0                        | 30  | 511 |
| Trend | 7    | 5       | rs156063<br>9        | 1736092<br>74 | 0.000013<br>24  |                  | 11                       | 81  | 173 | 11                       | 99  | 431 |
| Trend | 8    | 17      | rs197813<br>6        | 3237769<br>8  | 0.000014<br>58  |                  | 57                       | 138 | 70  | 68                       | 258 | 215 |
| Trend | 9    | 17      | exm1284<br>008       |               | 0.000022<br>98  | <i>LOC728392</i> | 8                        | 78  | 179 | 5                        | 101 | 435 |
| Trend | 10   | 13      | rs954976<br>3        | 1140524<br>70 | 0.000024<br>32  |                  | 0                        | 50  | 215 | 22                       | 146 | 373 |
| Trend | 11   | 7       | rs198243<br>6        | 1344706<br>32 | 0.000026<br>39  |                  | 9                        | 98  | 158 | 9                        | 131 | 401 |
| Trend | 12   | 10      | rs707377<br>0        | 1541753<br>7  | 0.000026<br>81  | <i>CALD1</i>     | 1                        | 12  | 252 | 1                        | 84  | 456 |
| Trend | 13   | 13      |                      | 4872425       | 0.000028        |                  | 0                        | 29  | 236 | 0                        | 19  | 522 |
| Trend | 14   | 23      | rs645833<br>rs787922 | 6<br>9572143  | 15<br>0.000028  |                  | 0                        | 12  | 127 | 0                        | 1   | 234 |
| Trend | 15   | 17      | rs116559<br>26       | 3524337<br>0  | 0.000028<br>33  |                  | 24                       | 118 | 123 | 29                       | 176 | 336 |
| Trend | 16   | 12      | rs648851<br>9        | 1253298<br>4  | 0.000031<br>17  |                  | 6                        | 43  | 216 | 1                        | 49  | 491 |
| Trend | 17   | 1       | exm2250<br>857       | 2304695<br>05 | 0.000032<br>32  | <i>PGBD5</i>     | 80                       | 140 | 45  | 113                      | 268 | 160 |

|       |    |    |          |         |          |         |  |    |     |     |     |     |     |
|-------|----|----|----------|---------|----------|---------|--|----|-----|-----|-----|-----|-----|
|       |    |    | rs803290 | 3976787 | 0.000032 |         |  |    |     |     |     |     |     |
| Trend | 18 | 15 | 0        | 8       | 74       |         |  | 6  | 76  | 183 | 7   | 88  | 446 |
|       |    |    |          | 1033475 | 0.000034 |         |  |    |     |     |     |     |     |
| Trend | 19 | 13 | rs612938 | 91      | 82       |         |  | 2  | 57  | 205 | 0   | 63  | 477 |
|       |    |    | rs109310 | 1832389 | 0.000035 |         |  |    |     |     |     |     |     |
| Trend | 20 | 2  | 08       | 19      | 32       | PDE1A   |  | 38 | 131 | 96  | 132 | 276 | 133 |
| Domi- |    |    | rs602169 | 5069428 | 0.000001 |         |  |    |     |     |     |     |     |
| nant  | 1  | 20 | 3        | 7       | 494      |         |  | 42 | 154 | 69  | 59  | 247 | 235 |
| Domi- |    |    | rs283650 | 3991855 | 0.000002 |         |  |    |     |     |     |     |     |
| nant  | 2  | 21 | 5        | 3       | 134      | ERG     |  | 16 | 91  | 158 | 57  | 258 | 226 |
| Domi- |    |    | rs649864 | 1705087 | 0.000002 |         |  |    |     |     |     |     |     |
| nant  | 3  | 16 | 3        | 4       | 438      |         |  | 2  | 71  | 192 | 5   | 68  | 467 |
| Domi- |    |    | rs172966 | 1252968 | 0.000002 |         |  |    |     |     |     |     |     |
| nant  | 4  | 8  | 67       | 72      | 821      |         |  | 2  | 85  | 178 | 9   | 87  | 445 |
| Domi- |    |    | rs992593 | 1702824 | 0.000003 |         |  |    |     |     |     |     |     |
| nant  | 5  | 16 | 4        | 7       | 257      |         |  | 1  | 65  | 199 | 3   | 60  | 478 |
| Domi- |    |    | rs707377 | 1541753 | 0.000003 |         |  |    |     |     |     |     |     |
| nant  | 6  | 10 | 0        | 7       | 458      |         |  | 1  | 12  | 252 | 1   | 84  | 456 |
| Domi- |    |    | rs171028 | 1237285 | 0.000004 |         |  |    |     |     |     |     |     |
| nant  | 7  | 10 | 09       | 23      | 27       | NSMCE4A |  | 19 | 136 | 110 | 43  | 179 | 318 |
| Domi- |    |    | rs156063 | 1736092 | 0.000014 |         |  |    |     |     |     |     |     |
| nant  | 8  | 5  | 9        | 74      | 2        |         |  | 11 | 81  | 173 | 11  | 99  | 431 |
| Domi- |    |    | rs109005 | 2041081 | 0.000015 |         |  |    |     |     |     |     |     |
| nant  | 9  | 1  | 53       | 63      | 72       | ETNK2   |  | 32 | 118 | 115 | 87  | 303 | 151 |
| Domi- |    |    | rs297058 | 2120975 | 0.000017 |         |  |    |     |     |     |     |     |
| nant  | 10 | 1  | 0        | 21      | 62       |         |  | 5  | 39  | 221 | 12  | 154 | 375 |
| Domi- |    |    | rs605764 | 2996045 | 0.000018 |         |  |    |     |     |     |     |     |
| nant  | 11 | 20 | 9        | 8       | 29       | DEFB118 |  | 20 | 137 | 108 | 37  | 196 | 308 |
| Domi- |    |    | rs608744 | 2999025 | 0.000018 |         |  |    |     |     |     |     |     |
| nant  | 11 | 20 | 5        | 2       | 29       |         |  | 21 | 136 | 108 | 38  | 195 | 308 |
| Domi- |    |    | rs237685 | 3000335 | 0.000018 |         |  |    |     |     |     |     |     |
| nant  | 11 | 20 | 8        | 0       | 29       |         |  | 21 | 136 | 108 | 38  | 195 | 308 |
| Domi- |    |    | rs218056 | 3001885 | 0.000018 |         |  |    |     |     |     |     |     |
| nant  | 11 | 20 | 6        | 4       | 29       |         |  | 21 | 136 | 108 | 39  | 194 | 308 |
| Domi- |    |    | rs608821 | 3002178 | 0.000018 |         |  |    |     |     |     |     |     |
| nant  | 11 | 20 | 5        | 9       | 29       |         |  | 21 | 136 | 108 | 38  | 195 | 308 |
| Domi- |    |    | rs168396 | 2404383 | 0.000024 |         |  |    |     |     |     |     |     |
| nant  | 16 | 1  | 92       | 07      | 74       | FMN2    |  | 68 | 145 | 52  | 107 | 251 | 183 |
| Domi- |    |    | rs601722 | 4259322 | 0.000025 |         |  |    |     |     |     |     |     |
| nant  | 17 | 20 | 7        | 0       | 06       | TOX2    |  | 0  | 39  | 226 | 0   | 30  | 511 |
| Domi- |    |    |          | 2996501 | 0.000026 |         |  |    |     |     |     |     |     |
| nant  | 18 | 20 | rs709045 | 4       | 22       | DEFB119 |  | 20 | 136 | 109 | 37  | 196 | 308 |

|        |    |    |          |         |          |                 |    |     |     |     |     |     |
|--------|----|----|----------|---------|----------|-----------------|----|-----|-----|-----|-----|-----|
| Domi-  |    |    | exm2272  | 2996886 | 0.000026 |                 |    |     |     |     |     |     |
| nant   | 18 | 20 | 889      | 3       | 22       | DEFB119         | 20 | 136 | 109 | 37  | 196 | 308 |
| Domi-  |    |    | rs491127 | 2996886 | 0.000026 |                 |    |     |     |     |     |     |
| nant   | 18 | 20 | 4        | 3       | 22       | DEFB119         | 20 | 136 | 109 | 37  | 196 | 308 |
| Domi-  |    |    | rs220638 | 2997821 | 0.000026 |                 |    |     |     |     |     |     |
| nant   | 18 | 20 | 1        | 6       | 22       | DEFB119         | 20 | 136 | 109 | 37  | 196 | 308 |
| Domi-  |    |    |          | 2998190 | 0.000026 |                 |    |     |     |     |     |     |
| nant   | 18 | 20 | rs765736 | 7       | 22       |                 | 20 | 136 | 109 | 37  | 196 | 308 |
| Reces- |    |    | rs940352 | 1439941 | 0.000002 |                 |    |     |     |     |     |     |
| sive   | 1  | 6  | 1        | 99      | 564      | PHACTR2         | 11 | 138 | 116 | 80  | 241 | 220 |
| Reces- |    |    | rs482337 | 4517172 | 0.000002 | PRR5-           |    |     |     |     |     |     |
| sive   | 2  | 22 | 6        | 9       | 832      | ARHGAP8,ARHGAP8 | 9  | 117 | 139 | 72  | 191 | 278 |
| Reces- |    |    | rs940352 | 1440049 | 0.000003 |                 |    |     |     |     |     |     |
| sive   | 3  | 6  | 3        | 81      | 427      | PHACTR2         | 13 | 139 | 113 | 86  | 241 | 214 |
| Reces- |    |    | rs178280 | 4094699 | 0.000009 |                 |    |     |     |     |     |     |
| sive   | 4  | 13 | 5        | 3       | 06       | TTL             | 19 | 84  | 162 | 6   | 182 | 353 |
| Reces- |    |    | rs771972 |         | 0.000012 |                 |    |     |     |     |     |     |
| sive   | 5  | 5  | 3        | 2137758 | 46       |                 | 27 | 126 | 112 | 122 | 250 | 169 |
| Reces- |    |    | rs112552 | 1230196 | 0.000017 |                 |    |     |     |     |     |     |
| sive   | 6  | 10 | 7        | 16      | 14       |                 | 78 | 122 | 65  | 87  | 282 | 172 |
| Reces- |    |    | rs153920 | 2125809 | 0.000032 |                 |    |     |     |     |     |     |
| sive   | 7  | 1  | 6        | 22      | 9        | TMEM206         | 79 | 114 | 72  | 91  | 267 | 183 |
| Reces- |    |    | rs712260 | 1096416 | 0.000034 |                 |    |     |     |     |     |     |
| sive   | 8  | 11 | 7        | 52      | 87       |                 | 2  | 86  | 177 | 37  | 176 | 328 |
| Reces- |    |    |          | 1096409 | 0.000035 |                 |    |     |     |     |     |     |
| sive   | 9  | 11 | rs989695 | 72      | 42       |                 | 2  | 83  | 179 | 37  | 175 | 329 |
| Reces- |    |    | rs414127 | 2907987 | 0.000038 |                 |    |     |     |     |     |     |
| sive   | 10 | 7  | 5        | 0       | 35       | CPVL            | 81 | 124 | 60  | 94  | 289 | 158 |
| Reces- |    |    |          | 4591667 | 0.000038 |                 |    |     |     |     |     |     |
| sive   | 11 | 22 | rs136723 | 9       | 52       | FBLN1           | 29 | 95  | 141 | 18  | 206 | 316 |
| Reces- |    |    |          | 2908439 | 0.000057 |                 |    |     |     |     |     |     |
| sive   | 12 | 7  | rs505532 | 2       | 47       | CPVL            | 80 | 122 | 61  | 95  | 284 | 160 |
| Reces- |    |    | rs721949 | 6472214 | 0.000060 |                 |    |     |     |     |     |     |
| sive   | 13 | 17 | 5        | 5       | 64       | PRKCA           | 60 | 116 | 89  | 62  | 261 | 218 |
| Reces- |    |    | rs173008 | 9588252 | 0.000061 |                 |    |     |     |     |     |     |
| sive   | 14 | 13 | 65       | 4       | 64       | ABCC4           | 1  | 97  | 167 | 31  | 160 | 350 |
| Reces- |    |    | rs707650 | 1230217 | 0.000061 |                 |    |     |     |     |     |     |
| sive   | 15 | 10 | 0        | 31      | 72       |                 | 51 | 120 | 94  | 49  | 265 | 227 |
| Reces- |    |    | rs107850 | 7400640 | 0.000061 |                 |    |     |     |     |     |     |
| sive   | 16 | 12 | 56       | 1       | 94       |                 | 16 | 137 | 112 | 85  | 247 | 209 |
| Reces- |    |    | rs297658 | 1343349 | 0.000063 |                 |    |     |     |     |     |     |
| sive   | 17 | 8  | 9        | 04      | 01       |                 | 20 | 89  | 156 | 9   | 186 | 346 |

|        |    |   |          |          |          |              |    |     |     |    |     |     |
|--------|----|---|----------|----------|----------|--------------|----|-----|-----|----|-----|-----|
| Reces- |    |   | 1580893  | 0.000063 |          |              |    |     |     |    |     |     |
| sive   | 18 | 2 | rs876718 | 5        | 61       |              | 8  | 112 | 144 | 59 | 201 | 279 |
| Reces- |    |   | rs104969 | 1426650  | 0.000064 |              |    |     |     |    |     |     |
| sive   | 19 | 2 | 07       | 64       | 43       | <i>LRP1B</i> | 6  | 130 | 129 | 52 | 207 | 281 |
| Reces- |    |   | rs183257 | 2014905  | 0.000068 |              |    |     |     |    |     |     |
| sive   | 20 | 1 | 4        | 8        | 67       |              | 20 | 130 | 115 | 96 | 235 | 210 |

B/B, homozygote for the major allele for each SNP

Model, the genetic model in which candidate SNPs were selected by the GWAS; CHR, chromosome number; Position, chromosomal position (bp); Related gene, the nearest gene from the SNP site; A/A, homozygote for the minor allele for each SNP; A/B, heterozygote for each SNP; B/B, homozygote for the major allele for each SNP.

**Table S3.** Top 20 candidate SNPs selected from the GWAS for vomiting in all patients.

| Model | Rank | CH<br>R | SNP        | Position      | p                        | Related<br>gene | Genotype (Nausea<br>+) |     |     | Genotype (Nausea<br>-) |     |     |
|-------|------|---------|------------|---------------|--------------------------|-----------------|------------------------|-----|-----|------------------------|-----|-----|
|       |      |         |            |               |                          |                 | A/A                    | A/B | B/B | A/A                    | A/B | B/B |
| Trend | 1    | 2       | rs13420654 | 79560656      | 0.00000209<br>5          |                 | 0                      | 29  | 120 | 1                      | 43  | 613 |
| Trend | 2    | 18      | exm1387565 | 50866195      | 0.00000221<br>7          | <i>DCC</i>      | 1                      | 28  | 120 | 1                      | 45  | 611 |
| Trend | 3    | 5       | rs4518389  | 12432786<br>2 | 0.00000240<br>4          |                 | 16                     | 77  | 56  | 163                    | 346 | 146 |
| Trend | 4    | 5       | rs1421691  | 16454146<br>6 | 0.00000336<br>0.00000406 |                 | 6                      | 51  | 92  | 9                      | 127 | 520 |
| Trend | 5    | 2       | exm185124  | 32641040      | 6                        | <i>BIRC6</i>    | 0                      | 7   | 142 | 0                      | 2   | 655 |
| Trend | 5    | 3       | exm2047963 | 19597424<br>6 | 0.00000406<br>6          | <i>PCYT1A</i>   | 0                      | 7   | 142 | 0                      | 2   | 655 |
| Trend | 5    | 12      | rs1805772  | 9087081       | 0.00000406<br>6          | <i>PHC1</i>     | 0                      | 7   | 142 | 0                      | 2   | 655 |
| Trend | 8    | 20      | rs6013869  | 52619796      | 0.00000921<br>6          | <i>BCAS1</i>    | 24                     | 60  | 65  | 179                    | 312 | 166 |
| Trend | 9    | 20      | rs12624524 | 46557322      | 0.00000975<br>9          |                 | 3                      | 35  | 111 | 6                      | 67  | 584 |
| Trend | 10   | 20      | rs2299723  | 52622783      | 0.00001035               | <i>BCAS1</i>    | 58                     | 66  | 25  | 146                    | 321 | 190 |
| Trend | 11   | 5       | rs10440778 | 12432930<br>6 | 0.00001216               |                 | 16                     | 78  | 55  | 161                    | 343 | 153 |
| Trend | 12   | 9       | rs306772   | 12409235<br>5 | 0.00001335               | <i>GSN</i>      | 3                      | 46  | 100 | 4                      | 110 | 543 |
| Trend | 13   | 2       | rs2216322  | 56374910      | 0.00001457               |                 | 11                     | 58  | 80  | 21                     | 167 | 469 |
| Trend | 14   | 20      | rs6118234  | 8509458       | 0.00001568               | <i>PLCB1</i>    | 29                     | 66  | 54  | 40                     | 303 | 314 |

|          |    |    |            |          |            |         |    |    |     |     |     |     |
|----------|----|----|------------|----------|------------|---------|----|----|-----|-----|-----|-----|
| Trend    | 15 | 20 | rs7270072  | 57998583 | 0.00001769 |         | 25 | 88 | 36  | 68  | 304 | 285 |
|          |    |    |            | 16616488 |            |         |    |    |     |     |     |     |
| Trend    | 16 | 2  | rs1965757  | 7        | 0.00001807 | SCN2A   | 53 | 74 | 22  | 142 | 329 | 186 |
|          |    |    |            | 16755910 |            |         |    |    |     |     |     |     |
| Trend    | 17 | 4  | rs28391069 | 6        | 0.00002093 |         | 1  | 9  | 139 | 0   | 8   | 649 |
| Trend    | 18 | 15 | rs10520799 | 96201031 | 0.00002426 |         | 0  | 15 | 134 | 0   | 17  | 640 |
| Trend    | 19 | 19 | rs751792   | 35157254 | 0.00002445 |         | 46 | 61 | 42  | 94  | 308 | 255 |
| Trend    | 20 | 7  | rs12704714 | 93930713 | 0.00002464 |         | 41 | 67 | 41  | 86  | 309 | 261 |
|          |    |    |            |          |            |         |    |    |     |     |     |     |
|          |    |    |            | 10995506 |            | TMEM23  |    |    |     |     |     |     |
| Dominant | 1  | 5  | rs10064687 | 2        | 0.00000906 | 2       | 28 | 62 | 59  | 171 | 343 | 141 |
| Dominant | 2  | 2  | rs13420654 | 79560656 | 0.00000937 |         | 0  | 29 | 120 | 1   | 43  | 613 |
| Dominant | 3  | 20 | rs7270072  | 57998583 | 0.00001178 |         | 25 | 88 | 36  | 68  | 304 | 285 |
| Dominant | 4  | 18 | exm1387565 | 50866195 | 0.00001421 | DCC     | 1  | 28 | 120 | 1   | 45  | 611 |
| Dominant | 5  | 20 | rs6013869  | 52619796 | 0.00001427 | BCAS1   | 24 | 60 | 65  | 179 | 312 | 166 |
|          |    |    |            | 10991006 |            | TMEM23  |    |    |     |     |     |     |
| Dominant | 6  | 5  | rs4317370  | 7        | 0.00001449 | 2       | 28 | 62 | 59  | 173 | 341 | 143 |
|          |    |    |            | 16454146 |            |         |    |    |     |     |     |     |
| Dominant | 7  | 5  | rs1421691  | 6        | 0.00001715 |         | 6  | 51 | 92  | 9   | 127 | 520 |
| Dominant | 8  | 20 | rs12624524 | 46557322 | 0.00001763 |         | 3  | 35 | 111 | 6   | 67  | 584 |
|          |    |    |            |          |            | CCDC88  |    |    |     |     |     |     |
| Dominant | 9  | 2  | rs12991861 | 55585915 | 0.0000206  | A       | 39 | 82 | 28  | 121 | 296 | 240 |
| Dominant | 10 | 12 | rs4761419  | 76712538 | 0.00002599 |         | 17 | 81 | 50  | 45  | 264 | 348 |
| Dominant | 11 | 16 | rs12595990 | 12471112 | 0.00002909 | SNX29   | 22 | 56 | 71  | 131 | 333 | 193 |
|          |    |    |            | 10805871 |            |         |    |    |     |     |     |     |
| Dominant | 12 | 10 | rs10748915 | 6        | 0.00003335 |         | 11 | 86 | 48  | 47  | 266 | 341 |
| Dominant | 13 | 9  | rs13296679 | 71347988 | 0.00004011 | PIP5K1B | 17 | 86 | 46  | 78  | 254 | 323 |
|          |    |    |            | 18775399 |            |         |    |    |     |     |     |     |
| Dominant | 14 | 3  | rs11710227 | 5        | 0.00004041 |         | 21 | 76 | 52  | 70  | 234 | 352 |
|          |    |    |            | 18775388 |            |         |    |    |     |     |     |     |
| Dominant | 15 | 3  | exm2255887 | 9        | 0.00004112 |         | 21 | 76 | 52  | 70  | 235 | 352 |
|          |    |    |            | 18775388 |            |         |    |    |     |     |     |     |
| Dominant | 15 | 3  | rs16862908 | 9        | 0.00004112 |         | 21 | 76 | 52  | 70  | 235 | 352 |
| Dominant | 17 | 19 | rs11668036 | 35186128 | 0.00004865 |         | 13 | 48 | 87  | 81  | 312 | 263 |
|          |    |    |            |          |            | CCDC88  |    |    |     |     |     |     |
| Dominant | 18 | 2  | rs1045613  | 55516090 | 0.00005243 | A       | 39 | 80 | 30  | 120 | 292 | 245 |
|          |    |    |            |          |            | CCDC88  |    |    |     |     |     |     |
| Dominant | 19 | 2  | rs13019339 | 55589364 | 0.00005317 | A       | 48 | 78 | 23  | 149 | 301 | 207 |
| Dominant | 20 | 9  | rs4743505  | 98827451 | 0.00005637 |         | 15 | 44 | 90  | 70  | 311 | 276 |

|           |    |    |            |          |            |                 |    |    |     |     |     |     |
|-----------|----|----|------------|----------|------------|-----------------|----|----|-----|-----|-----|-----|
|           |    |    |            |          | 0.00000194 |                 |    |    |     |     |     |     |
| Recessive | 1  | 20 | rs6118234  | 8509458  | 9          | <i>PLCB1</i>    | 29 | 66 | 54  | 40  | 303 | 314 |
|           |    |    |            |          | 0.00000620 |                 |    |    |     |     |     |     |
| Recessive | 2  | 5  | rs9292416  | 31021518 | 8          |                 | 58 | 58 | 33  | 135 | 341 | 181 |
|           |    |    |            |          | 0.00000650 |                 |    |    |     |     |     |     |
| Recessive | 3  | 19 | rs751792   | 35157254 | 4          |                 | 46 | 61 | 42  | 94  | 308 | 255 |
| Recessive | 4  | 9  | rs7027092  | 95812707 | 0.00001309 |                 | 55 | 59 | 33  | 129 | 324 | 194 |
| Recessive | 5  | 5  | rs6869417  | 31020501 | 0.00001545 |                 | 56 | 61 | 32  | 133 | 333 | 191 |
| Recessive | 6  | 19 | rs1985840  | 54880076 | 0.00001764 |                 | 18 | 49 | 82  | 19  | 247 | 391 |
| Recessive | 7  | 4  | rs6448841  | 11861566 | 0.00001953 |                 | 17 | 49 | 83  | 17  | 249 | 391 |
| Recessive | 7  | 4  | rs12645979 | 11868097 | 0.00001953 |                 | 17 | 50 | 82  | 17  | 251 | 389 |
| Recessive | 9  | 9  | exm2266850 | 95812707 | 0.0000209  |                 | 55 | 61 | 33  | 129 | 327 | 195 |
| Recessive | 10 | 3  | rs9809465  | 16674026 | 0.00002504 |                 | 25 | 55 | 69  | 37  | 308 | 312 |
|           |    |    |            | 10624712 |            |                 |    |    |     |     |     |     |
| Recessive | 11 | 13 | rs10508158 | 4        | 0.00003162 |                 | 28 | 57 | 64  | 46  | 288 | 323 |
| Recessive | 12 | 19 | rs8109293  | 21009270 | 0.00003279 |                 | 57 | 55 | 37  | 140 | 354 | 162 |
| Recessive | 13 | 5  | rs40654    | 9371411  | 0.00003672 | <i>SEMA5A</i>   | 6  | 27 | 116 | 0   | 118 | 539 |
| Recessive | 14 | 17 | rs7219495  | 64722145 | 0.00003791 | <i>PRKCA</i>    | 40 | 61 | 48  | 82  | 316 | 259 |
| Recessive | 15 | 13 | rs2028809  | 44523136 | 0.00004081 |                 | 3  | 84 | 62  | 81  | 281 | 295 |
| Recessive | 16 | 20 | rs2299723  | 52622783 | 0.00004292 | <i>BCAS1</i>    | 58 | 66 | 25  | 146 | 321 | 190 |
| Recessive | 17 | 1  | rs12045323 | 11764281 | 0.00004639 | <i>C1orf187</i> | 9  | 69 | 71  | 124 | 307 | 226 |
|           |    |    |            | 12214653 |            |                 |    |    |     |     |     |     |
| Recessive | 18 | 11 | rs1025139  | 3        | 0.00004693 |                 | 20 | 44 | 85  | 26  | 247 | 384 |
| Recessive | 19 | 7  | rs12704714 | 93930713 | 0.00005179 |                 | 41 | 67 | 41  | 86  | 309 | 261 |
| Recessive | 20 | 11 | rs10830263 | 89100329 | 0.00005396 | <i>NOX4</i>     | 6  | 74 | 69  | 104 | 292 | 261 |

B/B, homozygote for the major allele for each

SNP

Model, the genetic model in which candidate SNPs were selected by the GWAS; CHR, chromosome number; Position, chromosomal position (bp); Related gene, the nearest gene from the SNP site; A/A, homozygote for the minor allele for each SNP; A/B, heterozygote for each SNP; B/B, homozygote for the major allele for each SNP.

**Table S4.** Top 20 candidate SNPs selected from the GWAS for PONV in all patients.

| Model | Rank | CH<br>R | SNP        | Posi-<br>tion | <i>p</i>               | Related gene | Genotype (Nau-<br>sea +) |     |     | Genotype (Nau-<br>sea -) |     |     |
|-------|------|---------|------------|---------------|------------------------|--------------|--------------------------|-----|-----|--------------------------|-----|-----|
|       |      |         |            |               |                        |              | A/<br>A                  | A/B | B/B | A/<br>A                  | A/B | B/B |
| Trend | 1    | 20      | rs6021693  | 5069428<br>7  | 0.0000020<br>62        | <i>TACC2</i> | 48                       | 156 | 76  | 53                       | 245 | 228 |
| Trend | 2    | 10      | rs7097450  | 1238780<br>29 | 0.0000073<br>02        |              | 3                        | 16  | 260 | 0                        | 6   | 518 |
| Trend | 3    | 13      | rs645833   | 4872425<br>6  | 0.0000075<br>39        |              | 0                        | 31  | 249 | 0                        | 17  | 509 |
| Trend | 4    | 16      | rs9925934  | 1702824<br>7  | 0.0000114<br>4         |              | 1                        | 67  | 212 | 3                        | 58  | 465 |
| Trend | 5    | 10      | rs7073770  | 1541753<br>7  | 0.0000147<br>9         |              | 1                        | 13  | 266 | 1                        | 83  | 442 |
| Trend | 6    | 20      | rs743093   | 5069584<br>9  | 0.0000157<br>6         | <i>ACCN1</i> | 35                       | 146 | 95  | 34                       | 235 | 254 |
| Trend | 7    | 8       | rs17296667 | 1252968<br>72 | 0.0000175<br>2         |              | 2                        | 90  | 188 | 9                        | 82  | 435 |
| Trend | 8    | 17      | rs1978136  | 3237769<br>8  | 0.0000191<br>5         |              | 60                       | 144 | 76  | 65                       | 252 | 209 |
| Trend | 9    | 16      | rs6498643  | 1705087<br>4  | 0.0000212<br>0.0000216 |              | 2                        | 73  | 205 | 5                        | 66  | 454 |
| Trend | 10   | 17      | rs886359   | 3239997<br>4  | 0.0000216<br>2         |              | 38                       | 141 | 101 | 128                      | 267 | 131 |
| Trend | 11   | 20      | rs6013382  | 5070263<br>3  | 0.0000224<br>2         | <i>ZFP64</i> | 35                       | 148 | 97  | 35                       | 235 | 256 |
| Trend | 11   | 20      | rs6013382  | 5070263<br>3  | 0.0000224<br>2         |              | 35                       | 148 | 97  | 35                       | 235 | 256 |
| Trend | 13   | 21      | rs2836505  | 3991855<br>3  | 0.0000235<br>3         | <i>ERG</i>   | 17                       | 101 | 162 | 56                       | 248 | 222 |
| Trend | 14   | 1       | rs11582464 | 3074526<br>8  | 0.0000255<br>3         |              | 8                        | 87  | 185 | 5                        | 105 | 416 |
| Trend | 15   | 17      | rs12602886 | 3239234<br>6  | 0.0000259<br>7         | <i>ACCN1</i> | 38                       | 141 | 101 | 128                      | 266 | 132 |
| Trend | 16   | 18      | rs1944967  | 3953113<br>9  | 0.0000260<br>9         |              | 61                       | 136 | 82  | 70                       | 231 | 225 |
| Trend | 17   | 20      | rs2273382  | 5070521<br>1  | 0.0000266<br>1         | <i>ZFP64</i> | 35                       | 148 | 97  | 35                       | 236 | 255 |
| Trend | 18   | 10      | rs7911912  | 1543908<br>0  | 0.0000298<br>9         |              | 1                        | 41  | 238 | 7                        | 140 | 378 |



|       |    |    |            |         |           |          |  |    |     |     |     |     |     |
|-------|----|----|------------|---------|-----------|----------|--|----|-----|-----|-----|-----|-----|
|       |    |    |            |         | 0.0000301 |          |  |    |     |     |     |     |     |
| Trend | 19 | 5  | rs7719723  | 2137758 | 9         |          |  | 30 | 134 | 116 | 119 | 242 | 165 |
|       |    |    |            | 6882034 | 0.0000306 |          |  |    |     |     |     |     |     |
| Trend | 20 | 5  | rs28558979 | 8       | 4         | OCLN     |  | 13 | 92  | 175 | 54  | 218 | 254 |
|       |    |    |            |         |           |          |  |    |     |     |     |     |     |
| Domi- |    |    |            | 1252968 | 0.0000009 |          |  |    |     |     |     |     |     |
| nant  | 1  | 8  | rs17296667 | 72      | 951       |          |  | 2  | 90  | 188 | 9   | 82  | 435 |
| Domi- |    |    |            | 1541753 | 0.0000024 |          |  |    |     |     |     |     |     |
| nant  | 2  | 10 | rs7073770  | 7       | 25        |          |  | 1  | 13  | 266 | 1   | 83  | 442 |
| Domi- |    |    |            | 1702824 | 0.0000048 |          |  |    |     |     |     |     |     |
| nant  | 3  | 16 | rs9925934  | 7       | 67        |          |  | 1  | 67  | 212 | 3   | 58  | 465 |
| Domi- |    |    |            | 1705087 | 0.0000055 |          |  |    |     |     |     |     |     |
| nant  | 4  | 16 | rs6498643  | 4       | 39        |          |  | 2  | 73  | 205 | 5   | 66  | 454 |
| Domi- |    |    |            | 5069428 | 0.0000062 |          |  |    |     |     |     |     |     |
| nant  | 5  | 20 | rs6021693  | 7       | 86        |          |  | 48 | 156 | 76  | 53  | 245 | 228 |
| Domi- |    |    |            | 9820680 | 0.0000099 |          |  |    |     |     |     |     |     |
| nant  | 6  | 6  | rs600613   | 5       | 47        |          |  | 52 | 157 | 71  | 77  | 233 | 216 |
| Domi- |    |    |            |         | 0.0000139 |          |  |    |     |     |     |     |     |
| nant  | 7  | 4  | rs4689343  | 6136653 | 2         | JAKMIP1  |  | 0  | 3   | 277 | 0   | 41  | 485 |
| Domi- |    |    |            | 4872425 | 0.0000155 |          |  |    |     |     |     |     |     |
| nant  | 8  | 13 | rs645833   | 6       | 7         |          |  | 0  | 31  | 249 | 0   | 17  | 509 |
| Domi- |    |    |            |         | 0.0000158 |          |  |    |     |     |     |     |     |
| nant  | 9  | 9  | rs7869201  | 5551261 | 5         | PDCD1LG2 |  | 40 | 142 | 98  | 61  | 197 | 268 |
| Domi- |    |    |            | 9825098 | 0.0000188 |          |  |    |     |     |     |     |     |
| nant  | 10 | 3  | exm333077  | 6       | 6         | GPR15    |  | 31 | 101 | 148 | 67  | 264 | 194 |
| Domi- |    |    |            | 9825098 | 0.0000193 |          |  |    |     |     |     |     |     |
| nant  | 11 | 3  | rs2230344  | 6       | 6         | GPR15    |  | 31 | 101 | 148 | 67  | 264 | 195 |
| Domi- |    |    |            | 2836610 | 0.0000197 |          |  |    |     |     |     |     |     |
| nant  | 12 | 7  | rs17156585 | 0       | 6         | CREB5    |  | 4  | 84  | 192 | 7   | 87  | 431 |
| Domi- |    |    |            | 2041081 | 0.0000203 |          |  |    |     |     |     |     |     |
| nant  | 13 | 1  | rs10900553 | 63      | 3         | ETNK2    |  | 33 | 127 | 120 | 86  | 294 | 146 |
| Domi- |    |    |            | 2837005 | 0.0000224 |          |  |    |     |     |     |     |     |
| nant  | 14 | 7  | rs6978238  | 8       | 4         | CREB5    |  | 2  | 83  | 195 | 7   | 83  | 436 |
| Domi- |    |    |            | 1237285 | 0.0000227 |          |  |    |     |     |     |     |     |
| nant  | 15 | 10 | rs17102809 | 23      | 8         | NSMCE4A  |  | 20 | 140 | 120 | 42  | 175 | 308 |
| Domi- |    |    |            | 2120975 | 0.0000231 |          |  |    |     |     |     |     |     |
| nant  | 16 | 1  | rs2970580  | 21      | 7         |          |  | 5  | 43  | 232 | 12  | 150 | 364 |
| Domi- |    |    |            | 5527463 | 0.0000240 |          |  |    |     |     |     |     |     |
| nant  | 17 | 17 | rs7212872  | 0       | 1         |          |  | 13 | 119 | 148 | 20  | 147 | 359 |
| Domi- |    |    |            | 3991855 | 0.0000240 |          |  |    |     |     |     |     |     |
| nant  | 18 | 21 | rs2836505  | 3       | 9         | ERG      |  | 17 | 101 | 162 | 56  | 248 | 222 |

|        |    |    |            |         |           |                        |    |     |     |     |     |     |
|--------|----|----|------------|---------|-----------|------------------------|----|-----|-----|-----|-----|-----|
| Domi-  |    |    |            | 1192271 | 0.0000256 |                        |    |     |     |     |     |     |
| nant   | 19 | 4  | rs2171726  | 2       | 6         |                        | 10 | 68  | 201 | 24  | 202 | 299 |
| Domi-  |    |    |            | 1543908 | 0.0000261 |                        |    |     |     |     |     |     |
| nant   | 20 | 10 | rs7911912  | 0       | 2         |                        | 1  | 41  | 238 | 7   | 140 | 378 |
| Reces- |    |    |            | 1440049 | 0.0000051 |                        |    |     |     |     |     |     |
| sive   | 1  | 6  | rs9403523  | 81      | 61        | <i>PHACTR2</i>         | 15 | 146 | 119 | 84  | 234 | 208 |
| Reces- |    |    |            | 1439941 | 0.0000064 |                        |    |     |     |     |     |     |
| sive   | 2  | 6  | rs9403521  | 99      | 21        | <i>PHACTR2</i>         | 13 | 145 | 122 | 78  | 234 | 214 |
| Reces- |    |    |            | 4517172 | 0.0000118 | <i>PRR5-</i>           |    |     |     |     |     |     |
| sive   | 3  | 22 | rs4823376  | 9       | 6         | <i>ARHGAP8,ARHGAP8</i> | 11 | 125 | 144 | 70  | 183 | 273 |
| Reces- |    |    |            | 6472214 | 0.0000129 |                        |    |     |     |     |     |     |
| sive   | 4  | 17 | rs7219495  | 5       | 80        | <i>PRKCA</i>           | 64 | 126 | 90  | 58  | 251 | 217 |
| Reces- |    |    |            | 1218901 | 0.0000180 |                        |    |     |     |     |     |     |
| sive   | 5  | 11 | rs10831744 | 3       | 1         | <i>MICAL2</i>          | 15 | 148 | 117 | 80  | 238 | 208 |
| Reces- |    |    |            | 2908439 | 0.0000216 |                        |    |     |     |     |     |     |
| sive   | 6  | 7  | rs505532   | 2       | 2         | <i>CPVL</i>            | 85 | 129 | 64  | 90  | 277 | 157 |
| Reces- |    |    |            | 2907987 | 0.0000224 |                        |    |     |     |     |     |     |
| sive   | 7  | 7  | rs4141275  | 0       | 4         | <i>CPVL</i>            | 85 | 132 | 63  | 90  | 281 | 155 |
| Reces- |    |    |            |         | 0.0000244 |                        |    |     |     |     |     |     |
| sive   | 8  | 5  | rs7719723  | 2137758 | 5         |                        | 30 | 134 | 116 | 119 | 242 | 165 |
| Reces- |    |    |            | 9588252 | 0.0000298 |                        |    |     |     |     |     |     |
| sive   | 9  | 13 | rs17300865 | 4       | 3         | <i>ABCC4</i>           | 1  | 100 | 179 | 31  | 157 | 338 |
| Reces- |    |    |            | 7400640 | 0.0000301 |                        |    |     |     |     |     |     |
| sive   | 10 | 12 | rs10785056 | 1       | 5         |                        | 17 | 141 | 122 | 84  | 243 | 199 |
| Reces- |    |    |            | 1553828 | 0.0000339 |                        |    |     |     |     |     |     |
| sive   | 11 | 6  | rs9322497  | 07      | 3         |                        | 52 | 108 | 120 | 44  | 253 | 229 |
| Reces- |    |    |            | 4554367 | 0.0000350 |                        |    |     |     |     |     |     |
| sive   | 12 | 20 | rs6122536  | 6       | 50        | <i>EYA2</i>            | 30 | 136 | 108 | 119 | 234 | 169 |
| Reces- |    |    | exm105207  | 1323252 | 0.0000387 |                        |    |     |     |     |     |     |
| sive   | 13 | 12 | 4          | 39      | 30        | <i>MMP17</i>           | 78 | 123 | 79  | 81  | 288 | 157 |
| Reces- |    |    |            | 1323252 | 0.0000391 |                        |    |     |     |     |     |     |
| sive   | 14 | 12 | rs6598163  | 39      | 70        | <i>MMP17</i>           | 78 | 123 | 79  | 81  | 287 | 157 |
| Reces- |    |    |            | 1311914 | 0.0000392 |                        |    |     |     |     |     |     |
| sive   | 15 | 9  | rs2270202  | 03      | 1         | <i>CERCAM</i>          | 26 | 156 | 98  | 107 | 256 | 163 |
| Reces- |    |    |            |         | 0.0000425 |                        |    |     |     |     |     |     |
| sive   | 16 | 8  | rs7816614  | 5344373 | 1         |                        | 19 | 75  | 185 | 6   | 156 | 358 |
| Reces- |    |    |            | 5488007 | 0.0000527 |                        |    |     |     |     |     |     |
| sive   | 17 | 19 | rs1985840  | 6       | 4         |                        | 25 | 95  | 160 | 12  | 201 | 313 |
| Reces- |    |    |            | 1421657 | 0.0000614 |                        |    |     |     |     |     |     |
| sive   | 18 | 4  | rs7672861  | 41      | 5         |                        | 32 | 106 | 142 | 20  | 209 | 296 |

|        |    |    |            |         |           |       |  |    |     |     |    |     |     |
|--------|----|----|------------|---------|-----------|-------|--|----|-----|-----|----|-----|-----|
| Reces- |    |    |            | 1857768 | 0.0000707 |       |  |    |     |     |    |     |     |
| sive   | 19 | 4  | rs12650715 | 50      | 9         |       |  | 21 | 127 | 132 | 92 | 203 | 231 |
| Reces- |    |    |            | 6473117 | 0.0000718 |       |  |    |     |     |    |     |     |
| sive   | 20 | 17 | rs8067877  | 8       | 80        | PRKCA |  | 62 | 126 | 92  | 59 | 249 | 218 |
| Reces- |    |    |            | 6473140 | 0.0000718 |       |  |    |     |     |    |     |     |
| sive   | 20 | 17 | rs6504452  | 2       | 80        | PRKCA |  | 62 | 126 | 92  | 59 | 249 | 218 |

B/B, homozygote for the major allele for each SNP

Model, the genetic model in which candidate SNPs were selected by the GWAS; CHR, chromosome number; Position, chromosomal position (bp); Related gene, the nearest gene from the SNP site; A/A, homozygote for the minor allele for each SNP; A/B, heterozygote for each SNP; B/B, homozygote for the major allele for each SNP.

**Table S5.** Top 20 candidate SNPs selected from the GWAS for nausea in patients who received propofol.

| Model | Rank | CHR | SNP        | Position | p               | Related gene | Genotype (Nausea +) |     |     | Genotype (Nausea -) |     |     |
|-------|------|-----|------------|----------|-----------------|--------------|---------------------|-----|-----|---------------------|-----|-----|
|       |      |     |            |          |                 |              | A/A                 | A/B | B/B | A/A                 | A/B | B/B |
| Trend | 1    | 17  | rs11079308 | 55604585 | 0.0000015<br>44 | MSI2         | 9                   | 54  | 86  | 1                   | 67  | 225 |
| Trend | 2    | 9   | rs4977887  | 23718520 | 0.0000015<br>99 | ELAVL2       | 10                  | 57  | 82  | 50                  | 148 | 95  |
| Trend | 3    | 6   | rs7356878  | 40494855 | 0.0000019<br>69 | LRFN2        | 52                  | 77  | 20  | 56                  | 145 | 92  |
| Trend | 4    | 6   | rs1433742  | 40503796 | 0.0000035<br>73 | LRFN2        | 26                  | 75  | 48  | 23                  | 112 | 158 |
| Trend | 5    | 5   | rs7719723  | 2137758  | 0.0000041<br>31 |              | 11                  | 71  | 67  | 73                  | 134 | 86  |
| Trend | 6    | 6   | rs382023   | 40491240 | 0.0000058<br>78 | LRFN2        | 15                  | 76  | 58  | 75                  | 151 | 67  |
| Trend | 7    | 15  | rs11072390 | 73136716 | 0.0000062<br>07 |              | 42                  | 72  | 35  | 39                  | 134 | 120 |
| Trend | 8    | 7   | rs1982436  | 13447063 | 0.0000070<br>65 | CALD1        | 5                   | 63  | 81  | 5                   | 65  | 223 |
| Trend | 9    | 6   | rs403606   | 40493903 | 0.0000072<br>95 | LRFN2        | 15                  | 73  | 61  | 76                  | 144 | 73  |
| Trend | 10   | 10  | rs10901376 | 12708581 | 0.0000124<br>9  |              | 0                   | 9   | 140 | 4                   | 62  | 227 |
| Trend | 11   | 17  | rs11655926 | 35243370 | 0.0000136<br>6  |              | 15                  | 68  | 66  | 11                  | 93  | 189 |
| Trend | 12   | 6   | rs909988   | 40489573 | 0.0000198<br>2  | LRFN2        | 35                  | 85  | 29  | 35                  | 151 | 107 |

|          |    |    |            |          |           |         |    |    |     |    |     |     |
|----------|----|----|------------|----------|-----------|---------|----|----|-----|----|-----|-----|
|          |    |    |            |          | 0.0000214 |         |    |    |     |    |     |     |
| Trend    | 13 | 15 | rs12439063 | 73150166 | 1         |         | 22 | 80 | 47  | 24 | 113 | 156 |
|          |    |    |            |          | 0.0000261 |         |    |    |     |    |     |     |
| Trend    | 14 | 23 | rs7879223  | 95721436 | 6         |         | 0  | 12 | 126 | 0  | 1   | 234 |
|          |    |    |            |          | 0.0000270 |         |    |    |     |    |     |     |
| Trend    | 15 | 6  | rs2235705  | 40486159 | 6         | LRFN2   | 25 | 83 | 41  | 19 | 145 | 129 |
|          |    |    |            |          | 0.0000283 |         |    |    |     |    |     |     |
| Trend    | 16 | 18 | rs540291   | 77585900 | 4         |         | 31 | 78 | 40  | 35 | 119 | 139 |
|          |    |    | exm-       |          | 0.0000321 |         |    |    |     |    |     |     |
| Trend    | 17 | 3  | rs2286720  | 42448471 | 3         | LYZL4   | 3  | 58 | 88  | 27 | 147 | 119 |
|          |    |    |            |          | 0.0000321 |         |    |    |     |    |     |     |
| Trend    | 17 | 3  | rs2286720  | 42448471 | 3         | LYZL4   | 3  | 58 | 88  | 27 | 147 | 119 |
|          |    |    |            |          | 0.0000365 |         |    |    |     |    |     |     |
| Trend    | 19 | 10 | rs10828239 | 21679527 | 2         |         | 31 | 86 | 32  | 38 | 130 | 123 |
|          |    |    |            |          | 0.0000397 |         |    |    |     |    |     |     |
| Trend    | 20 | 3  | rs1529047  | 98252027 | 8         |         | 16 | 63 | 70  | 11 | 91  | 191 |
|          |    |    |            |          |           |         |    |    |     |    |     |     |
|          |    |    |            | 13447063 | 0.0000046 |         |    |    |     |    |     |     |
| Dominant | 1  | 7  | rs1982436  | 2        | 2         | CALD1   | 5  | 63 | 81  | 5  | 65  | 223 |
|          |    |    |            |          | 0.0000058 |         |    |    |     |    |     |     |
| Dominant | 2  | 9  | rs4977887  | 23718520 | 09        | ELAVL2  | 10 | 57 | 82  | 50 | 148 | 95  |
|          |    |    |            | 12708581 | 0.0000065 |         |    |    |     |    |     |     |
| Dominant | 3  | 10 | rs10901376 | 8        | 65        |         | 0  | 9  | 140 | 4  | 62  | 227 |
|          |    |    |            |          | 0.0000066 | PDCD1L  |    |    |     |    |     |     |
| Dominant | 4  | 9  | rs4143813  | 5534243  | 94        | G2      | 9  | 63 | 77  | 14 | 63  | 216 |
|          |    |    |            |          | 0.0000087 | CCDC102 |    |    |     |    |     |     |
| Dominant | 5  | 18 | rs1942295  | 66544809 | 6         | B       | 10 | 39 | 100 | 21 | 141 | 131 |
| Dominant | 6  | 10 | rs10828239 | 21679527 | 0.0000139 |         | 31 | 86 | 32  | 38 | 130 | 123 |
|          |    |    |            |          | 0.0000141 |         |    |    |     |    |     |     |
| Dominant | 7  | 15 | rs12439063 | 73150166 | 2         |         | 22 | 80 | 47  | 24 | 113 | 156 |
|          |    |    |            |          | 0.0000144 |         |    |    |     |    |     |     |
| Dominant | 8  | 6  | rs1433742  | 40503796 | 2         | LRFN2   | 26 | 75 | 48  | 23 | 112 | 158 |
|          |    |    |            |          | 0.0000167 |         |    |    |     |    |     |     |
| Dominant | 9  | 5  | rs11749532 | 55002265 | 2         | SLC38A9 | 28 | 87 | 34  | 46 | 119 | 128 |
| Dominant | 10 | 6  | rs7356878  | 40494855 | 0.0000279 | LRFN2   | 52 | 77 | 20  | 56 | 145 | 92  |
|          |    |    |            |          | 0.0000279 |         |    |    |     |    |     |     |
| Dominant | 11 | 8  | rs12550470 | 55344415 | 5         |         | 15 | 58 | 76  | 43 | 162 | 88  |
|          |    |    |            |          | 0.0000298 |         |    |    |     |    |     |     |
| Dominant | 12 | 11 | rs7933966  | 32875597 | 8         | PRRG4   | 30 | 58 | 61  | 64 | 166 | 63  |
|          |    |    | exm-       |          | 0.0000298 |         |    |    |     |    |     |     |
| Dominant | 12 | 11 | rs10767971 | 32895664 | 8         |         | 30 | 58 | 61  | 64 | 166 | 63  |

|           |    |    |            |          |           |          |    |    |     |    |     |     |
|-----------|----|----|------------|----------|-----------|----------|----|----|-----|----|-----|-----|
|           |    |    |            |          | 0.0000298 |          |    |    |     |    |     |     |
| Dominant  | 12 | 11 | rs10767971 | 32895664 | 8         |          | 30 | 58 | 61  | 64 | 166 | 63  |
|           |    |    |            |          | 0.0000327 |          |    |    |     |    |     |     |
| Dominant  | 15 | 8  | rs13258851 | 55330814 | 8         |          | 11 | 48 | 90  | 30 | 148 | 115 |
|           |    |    |            |          | 0.0000328 |          |    |    |     |    |     |     |
| Dominant  | 16 | 10 | rs511991   | 29449129 | 4         |          | 24 | 67 | 58  | 58 | 177 | 58  |
|           |    |    |            | 24051196 | 0.0000342 |          |    |    |     |    |     |     |
| Dominant  | 17 | 1  | rs6658239  | 5        | 9         | FMN2     | 15 | 82 | 52  | 27 | 102 | 164 |
|           |    |    |            |          | 0.0000378 |          |    |    |     |    |     |     |
| Dominant  | 18 | 18 | rs540291   | 77585900 | 6         |          | 31 | 78 | 40  | 35 | 119 | 139 |
| Dominant  | 19 | 10 | rs2781256  | 25616473 | 0.000038  | GPR158   | 5  | 62 | 82  | 8  | 66  | 219 |
|           |    |    |            |          | 0.0000383 |          |    |    |     |    |     |     |
| Dominant  | 20 | 8  | rs10099341 | 55368646 | 6         |          | 17 | 59 | 73  | 46 | 162 | 84  |
|           |    |    |            |          |           |          |    |    |     |    |     |     |
|           |    |    |            |          | 0.0000050 |          |    |    |     |    |     |     |
| Recessive | 1  | 5  | rs7719723  | 2137758  | 31        |          | 11 | 71 | 67  | 73 | 134 | 86  |
|           |    |    |            | 14399419 | 0.0000118 |          |    |    |     |    |     |     |
| Recessive | 2  | 6  | rs9403521  | 9        | 4         | PHACTR2  | 4  | 78 | 67  | 46 | 121 | 126 |
|           |    |    |            |          | 0.0000119 |          |    |    |     |    |     |     |
| Recessive | 3  | 7  | rs4141275  | 29079870 | 3         | CPVL     | 52 | 68 | 29  | 47 | 161 | 85  |
| Recessive | 4  | 13 | rs1782805  | 40946993 | 0.0000191 | TTL      | 16 | 48 | 85  | 4  | 97  | 192 |
|           |    |    |            |          | 0.0000195 |          |    |    |     |    |     |     |
| Recessive | 5  | 8  | rs2942213  | 23427919 | 2         | SLC25A37 | 4  | 74 | 71  | 45 | 120 | 128 |
|           |    |    |            | 14400498 | 0.0000217 |          |    |    |     |    |     |     |
| Recessive | 6  | 6  | rs9403523  | 1        | 9         | PHACTR2  | 5  | 80 | 64  | 48 | 121 | 124 |
|           |    |    |            | 11961079 | 0.0000311 |          |    |    |     |    |     |     |
| Recessive | 7  | 3  | rs6782799  | 3        | 8         | GSK3B    | 16 | 86 | 47  | 81 | 127 | 85  |
|           |    |    |            | 11977688 | 0.0000311 |          |    |    |     |    |     |     |
| Recessive | 7  | 3  | rs17204878 | 0        | 8         | GSK3B    | 16 | 86 | 47  | 81 | 127 | 85  |
|           |    |    |            |          | 0.0000341 |          |    |    |     |    |     |     |
| Recessive | 9  | 4  | rs9306994  | 76576116 | 5         | G3BP2    | 0  | 63 | 86  | 25 | 98  | 169 |
|           |    |    |            |          | 0.0000380 |          |    |    |     |    |     |     |
| Recessive | 10 | 5  | rs4362905  | 52927597 | 2         | NDUFS4   | 2  | 71 | 76  | 35 | 115 | 143 |
|           |    |    |            |          | 0.0000380 |          |    |    |     |    |     |     |
| Recessive | 10 | 5  | rs11745611 | 53011223 | 2         |          | 2  | 73 | 74  | 35 | 116 | 142 |
|           |    |    |            |          | 0.0000454 |          |    |    |     |    |     |     |
| Recessive | 12 | 12 | rs10437774 | 20139160 | 6         |          | 12 | 77 | 59  | 69 | 136 | 88  |
|           |    |    |            | 11045157 |           |          |    |    |     |    |     |     |
| Recessive | 13 | 9  | rs10816556 | 9        | 0.0000477 |          | 9  | 34 | 106 | 0  | 74  | 219 |
|           |    |    |            | 11045163 |           |          |    |    |     |    |     |     |
| Recessive | 13 | 9  | rs10759254 | 7        | 0.0000477 |          | 9  | 34 | 106 | 0  | 74  | 219 |

|           |    |    |           |          |           |               |    |    |    |    |     |     |
|-----------|----|----|-----------|----------|-----------|---------------|----|----|----|----|-----|-----|
| Recessive | 15 | 3  | rs7651125 | 6401420  | 0.0000482 |               | 3  | 65 | 81 | 39 | 105 | 148 |
|           |    |    |           | 11622768 | 0.0000485 |               |    |    |    |    |     |     |
| Recessive | 16 | 11 | rs482795  | 7        | 5         |               | 14 | 84 | 51 | 74 | 130 | 89  |
|           |    |    |           | 11963181 | 0.0000488 |               |    |    |    |    |     |     |
| Recessive | 17 | 3  | rs6438552 | 4        | 6         | <i>GSK3B</i>  | 16 | 85 | 47 | 80 | 128 | 85  |
|           |    |    |           |          | 0.0000610 |               |    |    |    |    |     |     |
| Recessive | 18 | 21 | rs2268284 | 36220679 | 1         | <i>RUNX1</i>  | 48 | 69 | 32 | 44 | 169 | 79  |
|           |    |    |           |          | 0.0000613 |               |    |    |    |    |     |     |
| Recessive | 19 | 6  | rs403606  | 40493903 | 4         | <i>LRFN2</i>  | 15 | 73 | 61 | 76 | 144 | 73  |
|           |    |    |           | 13085344 |           |               |    |    |    |    |     |     |
| Recessive | 20 | 8  | rs837065  | 7        | 0.0000622 | <i>FAM49B</i> | 10 | 86 | 53 | 62 | 139 | 92  |

B/B, homozygote for the major allele infor each

SNP

Model, the genetic model in which candidate SNPs were selected by the GWAS; CHR, chromosome number; Position, chromosomal position (bp); Related gene, the nearest gene from the SNP site; A/A, homozygote for the minor allele for each SNP; A/B, heterozygote for each SNP; B/B, homozygote for the major allele for each SNP.

**Table S6.** Top 20 candidate SNPs selected from the GWAS for PONV in patients who received propofol.

| Model | Rank | CHR | SNP        | Position | p          | Related gene  | Genotype (Nausea +) |     |     | Genotype (Nausea -) |     |     |
|-------|------|-----|------------|----------|------------|---------------|---------------------|-----|-----|---------------------|-----|-----|
|       |      |     |            |          |            |               | A/A                 | A/B | B/B | A/A                 | A/B | B/B |
|       |      |     |            |          | 0.00000242 |               |                     |     |     |                     |     |     |
| Trend | 1    | 13  | rs1752136  | 48726219 | 5          |               | 0                   | 25  | 135 | 0                   | 9   | 273 |
|       |      |     |            |          | 0.00000269 |               |                     |     |     |                     |     |     |
| Trend | 2    | 6   | rs7356878  | 40494855 | 5          | <i>LRFN2</i>  | 55                  | 82  | 23  | 53                  | 140 | 89  |
|       |      |     |            |          | 0.00000368 |               |                     |     |     |                     |     |     |
| Trend | 3    | 17  | rs11079308 | 55604585 | 2          | <i>MSI2</i>   | 9                   | 57  | 94  | 1                   | 64  | 217 |
|       |      |     |            |          | 0.00000447 |               |                     |     |     |                     |     |     |
| Trend | 4    | 9   | rs4977887  | 23718520 | 9          | <i>ELAVL2</i> | 11                  | 64  | 85  | 49                  | 141 | 92  |
|       |      |     |            |          | 0.00000505 |               |                     |     |     |                     |     |     |
| Trend | 5    | 15  | rs11072390 | 73136716 | 6          |               | 44                  | 78  | 38  | 37                  | 128 | 117 |
| Trend | 6    | 2   | rs1922717  | 11024358 | 0.00000913 |               | 4                   | 41  | 115 | 0                   | 35  | 247 |
|       |      |     |            |          | 0.00000941 |               |                     |     |     |                     |     |     |
| Trend | 7    | 5   | rs7719723  | 2137758  | 6          |               | 14                  | 75  | 71  | 70                  | 130 | 82  |
| Trend | 8    | 6   | rs403606   | 40493903 | 0.00001074 | <i>LRFN2</i>  | 17                  | 79  | 64  | 74                  | 138 | 70  |
| Trend | 9    | 6   | rs1433742  | 40503796 | 0.00001093 | <i>LRFN2</i>  | 28                  | 77  | 55  | 21                  | 110 | 151 |
|       |      |     | exm-       |          |            |               |                     |     |     |                     |     |     |
| Trend | 10   | 3   | rs2286720  | 42448471 | 0.00001378 | <i>LYZL4</i>  | 3                   | 63  | 94  | 27                  | 142 | 113 |
| Trend | 10   | 3   | rs2286720  | 42448471 | 0.00001378 | <i>LYZL4</i>  | 3                   | 63  | 94  | 27                  | 142 | 113 |

|       |    |    |            |          |            |          |    |    |     |    |     |     |
|-------|----|----|------------|----------|------------|----------|----|----|-----|----|-----|-----|
| Trend | 12 | 7  | rs4141275  | 29079870 | 0.00001401 | CPVL     | 55 | 75 | 30  | 44 | 154 | 84  |
| Trend | 13 | 3  | rs1529047  | 98252027 | 0.00001439 |          | 16 | 70 | 74  | 11 | 84  | 187 |
| Trend | 14 | 6  | rs382023   | 40491240 | 0.00001476 | LRFN2    | 17 | 83 | 60  | 73 | 144 | 65  |
| Trend | 15 | 15 | rs12439063 | 73150166 | 0.00001589 |          | 23 | 86 | 51  | 23 | 107 | 152 |
| Trend | 16 | 5  | rs28558979 | 68820348 | 0.00001621 | OCLN     | 3  | 52 | 105 | 25 | 126 | 131 |
| Trend | 17 | 17 | rs4644888  | 64745690 | 0.00002141 | PRKCA    | 22 | 64 | 74  | 65 | 145 | 72  |
| Trend | 18 | 17 | rs8070561  | 64747056 | 0.00002539 | PRKCA    | 22 | 64 | 74  | 64 | 146 | 72  |
| Trend | 19 | 3  | rs4682737  | 42484782 | 0.0000284  |          | 3  | 64 | 93  | 27 | 141 | 114 |
| Trend | 20 | 2  | rs17036833 | 69851974 | 0.00002911 | AAK1     | 1  | 34 | 125 | 0  | 23  | 259 |
| Domi- |    |    |            |          | 0.00000464 |          |    |    |     |    |     |     |
| nant  | 1  | 18 | rs1942295  | 66544809 | 3          | CCDC102B | 10 | 43 | 107 | 21 | 137 | 124 |
| Domi- |    |    |            |          | 0.00000701 |          |    |    |     |    |     |     |
| nant  | 2  | 13 | rs1752136  | 48726219 | 1          |          | 0  | 25 | 135 | 0  | 9   | 273 |
| Domi- |    |    |            |          | 0.00000770 |          |    |    |     |    |     |     |
| nant  | 3  | 15 | rs12439063 | 73150166 | 9          |          | 23 | 86 | 51  | 23 | 107 | 152 |
| Domi- |    |    |            |          | 0.000011   |          |    |    |     |    |     |     |
| nant  | 4  | 1  | rs1571549  | 86050965 |            |          | 25 | 68 | 67  | 67 | 154 | 61  |
| Domi- |    |    |            |          | 0.00001418 | PRKCA    | 22 | 64 | 74  | 65 | 145 | 72  |
| nant  | 5  | 17 | rs4644888  | 64745690 |            | PRKCA    | 22 | 64 | 74  | 64 | 146 | 72  |
| Domi- |    |    |            |          | 0.00001418 | PRKCA    | 22 | 64 | 74  | 64 | 146 | 72  |
| nant  | 5  | 17 | rs8070561  | 64747056 |            |          | 22 | 64 | 74  | 64 | 146 | 72  |
| Domi- |    |    |            |          | 0.00002622 |          |    |    |     |    |     |     |
| nant  | 7  | 14 | rs4983168  | 26851322 |            |          | 28 | 93 | 39  | 46 | 111 | 125 |
| Domi- |    |    |            | 13447063 |            |          |    |    |     |    |     |     |
| nant  | 8  | 7  | rs1982436  | 2        | 0.00002819 | CALD1    | 5  | 65 | 90  | 5  | 63  | 214 |
| Domi- |    |    |            |          | 0.00002928 |          |    |    |     |    |     |     |
| nant  | 9  | 23 | rs1318834  | 39345412 |            |          | 43 | 83 | 20  | 48 | 104 | 75  |
| Domi- |    |    |            | 24051196 |            |          |    |    |     |    |     |     |
| nant  | 10 | 1  | rs6658239  | 5        | 0.0000307  | FMN2     | 17 | 86 | 57  | 25 | 98  | 159 |
| Domi- |    |    |            |          | 0.00003229 | ELAVL2   | 11 | 64 | 85  | 49 | 141 | 92  |
| nant  | 11 | 9  | rs4977887  | 23718520 |            |          | 11 | 64 | 85  | 49 | 141 | 92  |
| Domi- |    |    |            |          | 0.00003232 | C4orf19  | 0  | 1  | 159 | 2  | 26  | 254 |
| nant  | 12 | 4  | rs2380737  | 37536119 |            |          | 0  | 1  | 159 | 2  | 26  | 254 |
| Domi- |    |    |            | 16732370 |            |          |    |    |     |    |     |     |
| nant  | 13 | 3  | rs9837095  | 9        | 0.00003708 | WDR49    | 2  | 27 | 131 | 14 | 89  | 178 |
| Domi- |    |    |            | 16732001 |            |          |    |    |     |    |     |     |
| nant  | 14 | 3  | exm363153  | 0        | 0.0000384  | WDR49    | 2  | 27 | 131 | 14 | 89  | 179 |
| Domi- |    |    |            |          | 0.00004003 | FLYWCH1  | 18 | 89 | 51  | 36 | 97  | 149 |
| nant  | 15 | 16 | rs2074365  | 2964283  |            |          | 18 | 89 | 51  | 36 | 97  | 149 |

|           |    |    |            |          |            |                 |    |    |     |    |     |     |
|-----------|----|----|------------|----------|------------|-----------------|----|----|-----|----|-----|-----|
| Domi-     |    |    |            | 18192651 |            |                 |    |    |     |    |     |     |
| nant      | 16 | 4  | rs11946898 | 8        | 0.00004213 |                 | 34 | 96 | 30  | 54 | 123 | 105 |
| Domi-     |    |    |            |          |            |                 |    |    |     |    |     |     |
| nant      | 17 | 9  | rs7869201  | 5551261  | 0.00004234 | <i>PDCD1LG2</i> | 26 | 84 | 50  | 36 | 101 | 145 |
| Domi-     |    |    |            |          |            |                 |    |    |     |    |     |     |
| nant      | 18 | 8  | rs13258851 | 55330814 | 0.00004506 |                 | 12 | 53 | 95  | 29 | 143 | 110 |
| Domi-     |    |    |            |          |            |                 |    |    |     |    |     |     |
| nant      | 19 | 10 | rs10828239 | 21679527 | 0.00005148 |                 | 31 | 92 | 37  | 38 | 124 | 118 |
| Domi-     |    |    |            |          |            |                 |    |    |     |    |     |     |
| nant      | 20 | 3  | rs1529047  | 98252027 | 0.00005312 |                 | 16 | 70 | 74  | 11 | 84  | 187 |
|           |    |    |            |          |            |                 |    |    |     |    |     |     |
|           |    |    |            |          | 0.00000517 |                 |    |    |     |    |     |     |
| Recessive | 1  | 8  | rs2942213  | 23427919 | 1          | <i>SLC25A37</i> | 4  | 81 | 75  | 45 | 113 | 124 |
|           |    |    |            |          | 0.00000925 | <i>CPVL,CPV</i> |    |    |     |    |     |     |
| Recessive | 2  | 7  | rs4141275  | 29079870 | 3          | <i>L</i>        | 55 | 75 | 30  | 44 | 154 | 84  |
| Recessive | 3  | 5  | rs4362905  | 52927597 | 0.0000095  | <i>NDUFS4</i>   | 2  | 78 | 80  | 35 | 108 | 139 |
| Recessive | 3  | 5  | rs11745611 | 53011223 | 0.0000095  |                 | 2  | 80 | 78  | 35 | 109 | 138 |
|           |    |    |            | 15814560 |            |                 |    |    |     |    |     |     |
| Recessive | 5  | 7  | rs12698219 | 6        | 0.00001116 | <i>PTPRN2</i>   | 11 | 32 | 117 | 0  | 51  | 231 |
| Recessive | 6  | 3  | rs7651125  | 6401420  | 0.00001256 |                 | 3  | 69 | 88  | 39 | 101 | 141 |
| Recessive | 7  | 5  | rs567      | 52979097 | 0.00001627 | <i>NDUFS4</i>   | 2  | 78 | 80  | 34 | 109 | 139 |
| Recessive | 8  | 1  | rs1195866  | 81678254 | 0.00001682 |                 | 16 | 47 | 96  | 3  | 98  | 178 |
| Recessive | 9  | 17 | rs7219495  | 64722145 | 0.00002003 | <i>PRKCA</i>    | 41 | 75 | 44  | 28 | 141 | 113 |
|           |    |    |            | 11622768 |            |                 |    |    |     |    |     |     |
| Recessive | 10 | 11 | rs482795   | 7        | 0.00002028 |                 | 15 | 93 | 52  | 73 | 121 | 88  |
| Recessive | 11 | 5  | rs7719723  | 2137758  | 0.00002501 |                 | 14 | 75 | 71  | 70 | 130 | 82  |
| Recessive | 12 | 3  | rs6796561  | 6409144  | 0.00002696 |                 | 0  | 57 | 103 | 23 | 99  | 160 |
|           |    |    |            | 12348387 |            |                 |    |    |     |    |     |     |
| Recessive | 12 | 10 | rs2420953  | 9        | 0.00002696 |                 | 0  | 65 | 95  | 23 | 102 | 157 |
|           |    |    |            | 12348662 |            |                 |    |    |     |    |     |     |
| Recessive | 12 | 10 | rs2935689  | 6        | 0.00002696 |                 | 0  | 65 | 95  | 23 | 102 | 157 |
|           |    |    |            |          |            | <i>CPVL,CPV</i> |    |    |     |    |     |     |
| Recessive | 15 | 7  | rs505532   | 29084392 | 0.00003413 | <i>L</i>        | 55 | 73 | 31  | 47 | 149 | 84  |
| Recessive | 16 | 8  | rs2942201  | 23419176 | 0.0000366  | <i>SLC25A37</i> | 3  | 76 | 81  | 36 | 105 | 141 |
| Recessive | 17 | 1  | rs11165660 | 96993561 | 0.00003954 |                 | 16 | 90 | 54  | 73 | 127 | 80  |
| Recessive | 18 | 14 | rs10483614 | 53151428 | 0.00004454 | <i>ERO1L</i>    | 20 | 62 | 78  | 7  | 114 | 161 |
| Recessive | 19 | 7  | rs6964887  | 17728255 | 0.00004826 |                 | 50 | 69 | 38  | 42 | 147 | 92  |
| Recessive | 20 | 5  | rs6886811  | 53020039 | 0.00005066 |                 | 2  | 75 | 82  | 32 | 106 | 144 |

Model, the genetic model in which candidate SNPs were selected by the GWAS; CHR, chromosome number; Position, chromosomal position (bp); Related gene, the nearest gene from the SNP site; A/A, homozygote for the minor allele for each SNP; A/B, heterozygote for each SNP; B/B, homozygote for the major allele for each SNP.



(a) Additive:

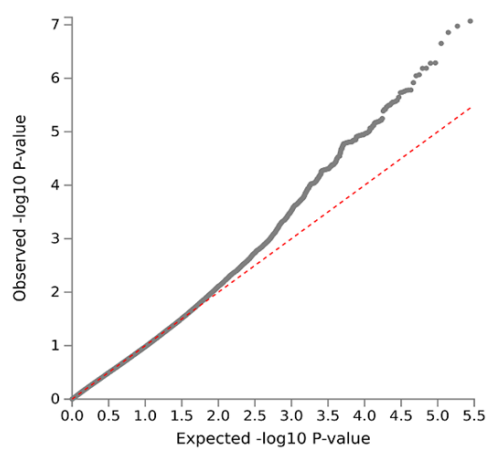

(b) Dominant:

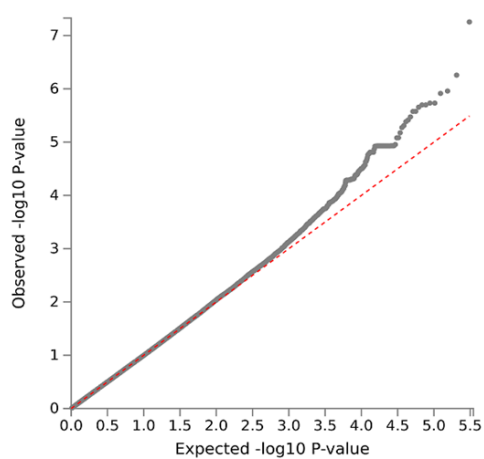

(c) Recessive:

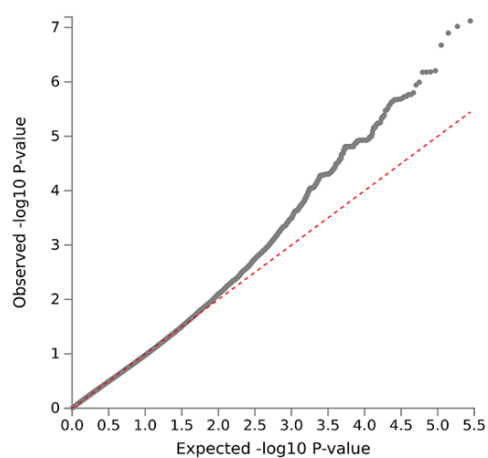

**Figure S1.** Log quantile-quantile (QQ)  $p$ -value plot as a result of the GWAS for the frequency of nausea in all patients. (a) Plot of the results from the additive model. (b) Plot of the results from the dominant model. (c) Plot of the results from the recessive model.

**(a) Additive:**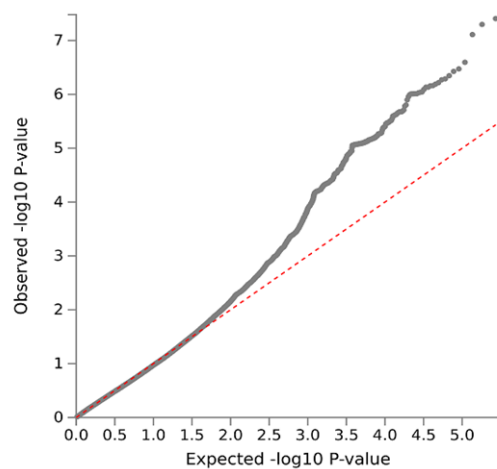**(b) Dominant:**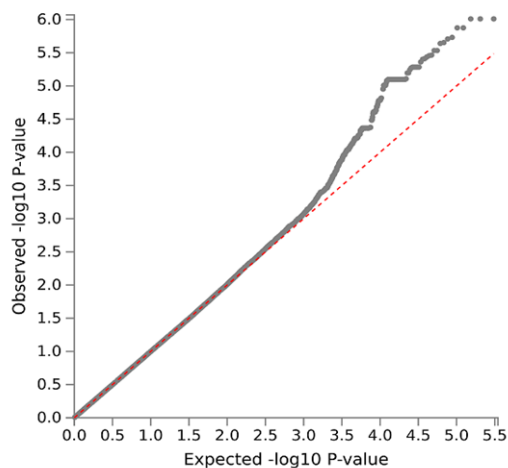**(c) Recessive:**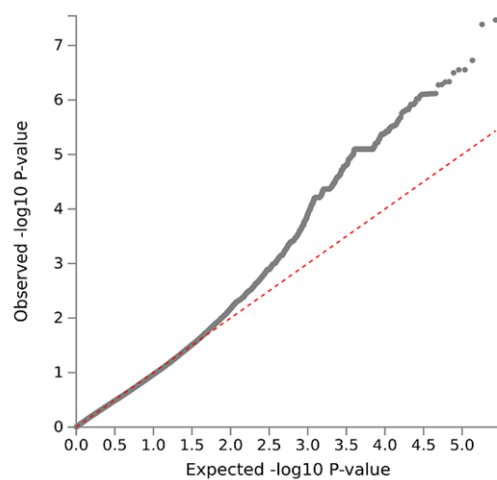

**Figure S2.** Log quantile-quantile (QQ)  $p$ -value plot as a result of the GWAS for the frequency of nausea in patients with propofol. (a) Plot of the results from the additive model. (b) Plot of the results from the dominant model. (c) Plot of the results from the recessive model.

**(a) Trend:**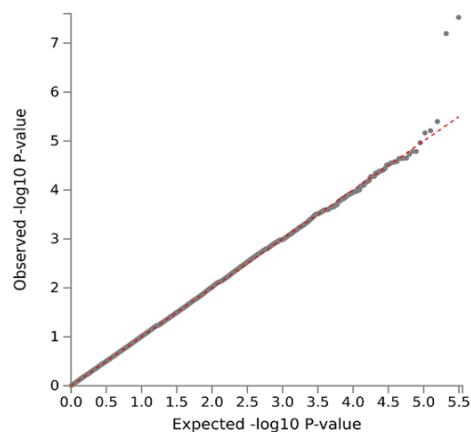**(b) Dominant:**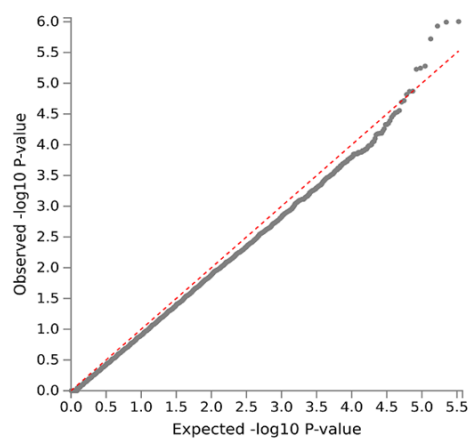**(c) Recessive:**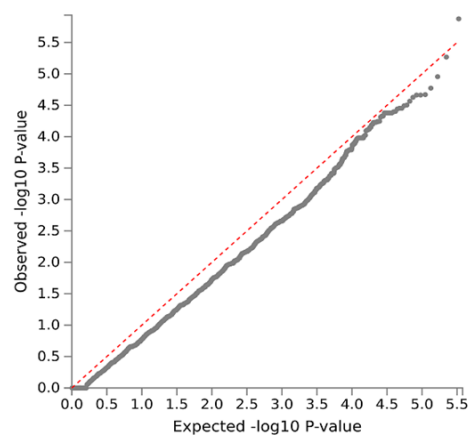

**Figure S3.** Log quantile-quantile (QQ)  $p$ -value plot as a result of the GWAS for vomiting in patients who received propofol. (a) Plot of the results from the trend model. (b) Plot of the results from the dominant model. (c) Plot of the results from the recessive model.

(a) rs140703637-A:

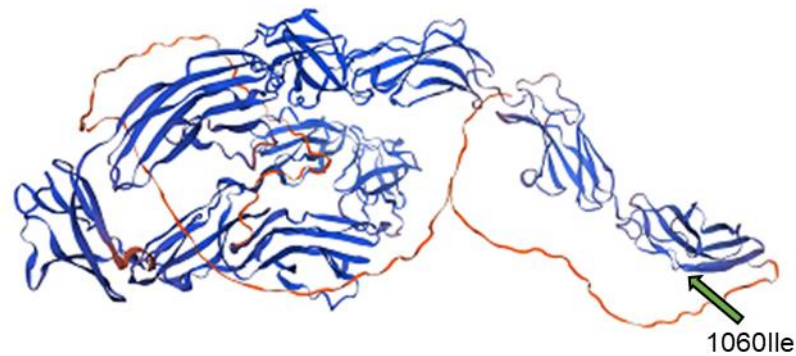

(b) rs140703637-C:

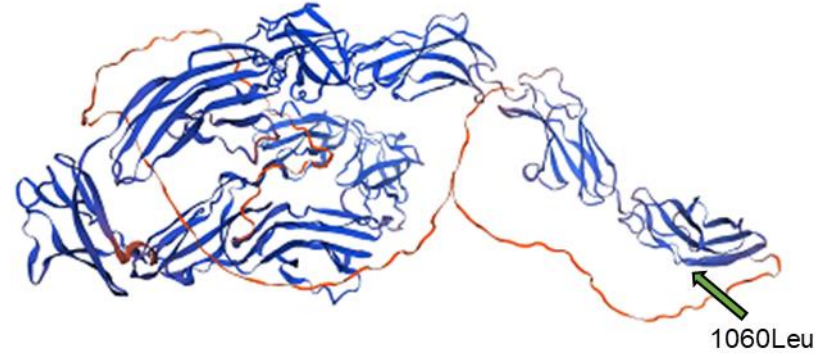

**Figure S4.** Protein structures of contactin 5 predicted from amino acid sequence (NCBI accession no. NP\_001230199.1). (a) Protein structure predicted from amino acid sequence, including isoleucine residue, that corresponds to the A allele of the rs140703637 SNP. (b) Protein structure predicted from amino acid sequence, including leucine residue, that corresponds to the C allele of the rs140703637 SNP. The amino acids that correspond to the position of the rs140703637 SNP are indicated by the arrowheads.

(a) rs45574836-G:

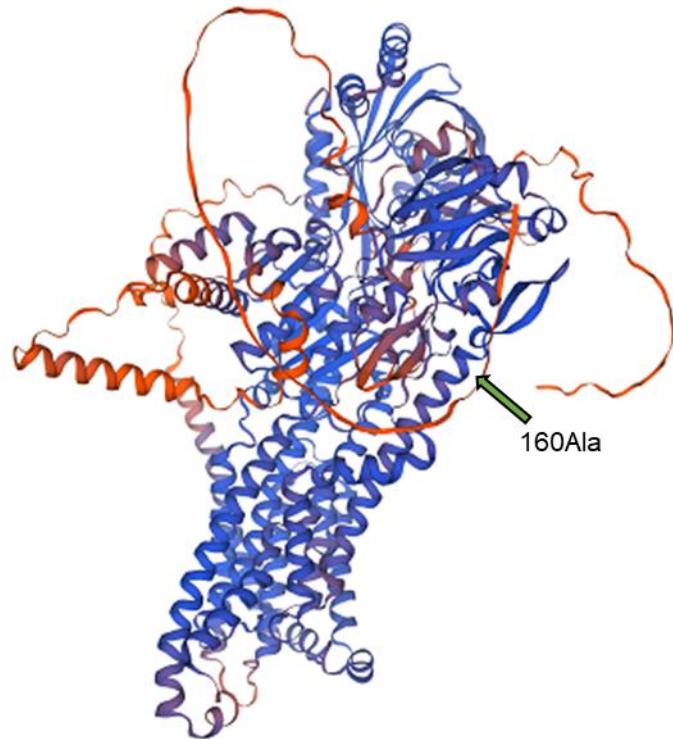

(b) rs45574836-A:

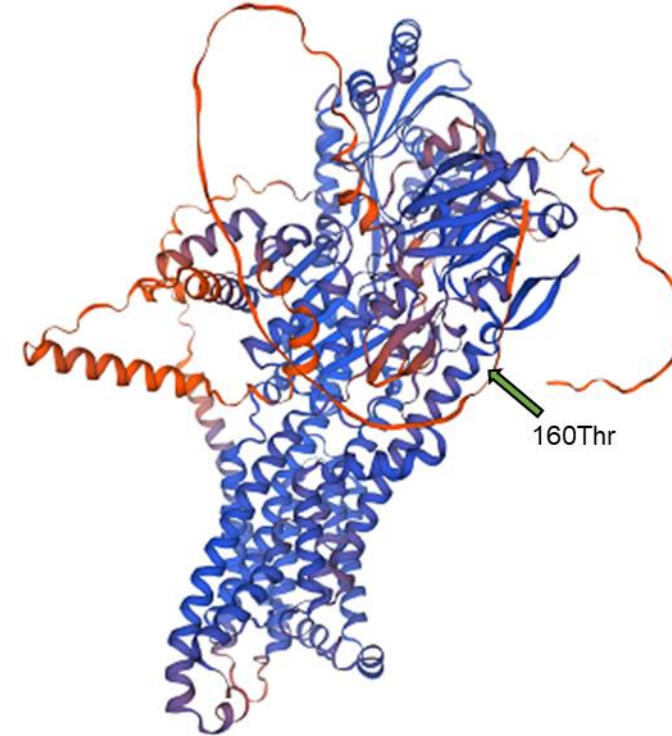

**Figure S5.** Protein structures of ATPase phospholipid transporting 8B3 predicted from amino acid sequence (NCBI accession no. NP\_001171473.1). (a) Protein structure predicted from amino acid sequence, including alanine residue, that corresponds to the G allele of the rs45574836 SNP. (b) Protein structure predicted from amino acid sequence, including threonine residue, that corresponds to the A allele of the rs45574836 SNP. The amino acids that correspond to the position of the rs140703637 SNP are indicated by the arrowheads.
